# Supplementary material
Source: PubMed Central journal article supplement (PMC6325019)
Supplement: NIHMS980774-supplement-supp_info.pdf [file NIHMS980774-supplement-supp_info.pdf]

# Supporting Material for

## LIVER-SELECTIVE MMP-9 INHIBITION REDUCES INJURY AND ACCELERATES LIVER REGENERATION

Xiangdong Wang, Ana C. Maretti-Mira, Lei Wang, Laurie D. DeLeve

correspondence to: [deleve@med.usc.edu](mailto:deleve@med.usc.edu)

### **This file includes:**

Supporting Figures S1-6

Supporting Tables S1-2

References

## Supporting Figure S1

### CD133+ Bone Marrow Cells

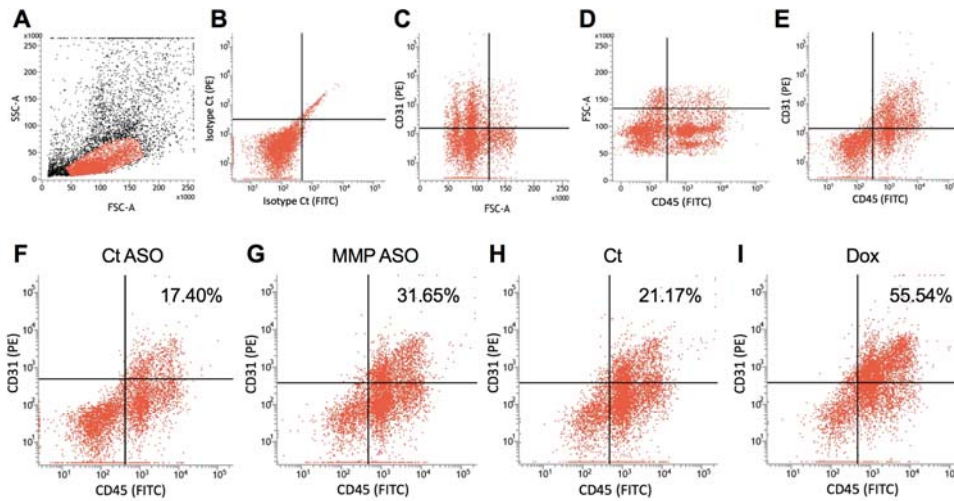

### CD133+ Circulating Cells

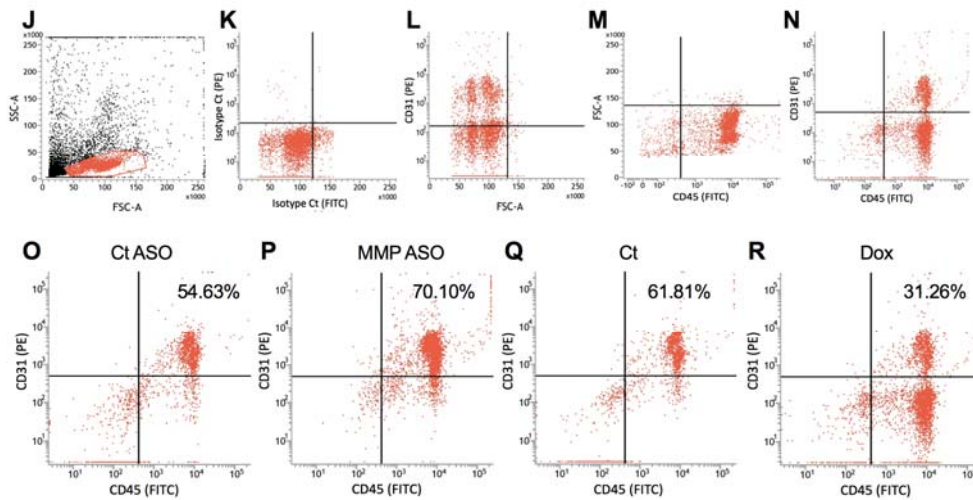

**Supporting Figure S1: Representative images of Flow Cytometry assay of bone marrow and circulating sprocs. (A-I)** Sorting of CD133+CD31+CD45+ bone marrow cells. **(J-R)** Sorting of CD133+CD31+CD45+ blood cells. Bone marrow or circulating mononuclear cells underwent positive selection with CD133 immunomagnetic beads using AutoMACS Pro, and then stained for CD31 (PE) and CD45 (FITC). Cell suspensions were sorted using the following gating strategy: **(A/J)** Target population was gated based on size x granularity and used for further analysis. **(B/K)** Quadrants were designed based on the isotype control staining (PE and FITC), which differentiated non-specific background signal from specific antibody signal. The presence of **(C/L)** CD31+ and **(D/M)** CD45+ populations was confirmed, and then the double positive cells were analyzed and quantified **(E/N)**.

This analysis was performed in using animals treated with Ct ASO (**F/O**), MMP ASO (**G/P**), Ct (**H/Q**) and Doxycycline (**I/R**).

## Supporting Figure S2A

MMP-9 gene expression in  
normal liver vs normal LSECs

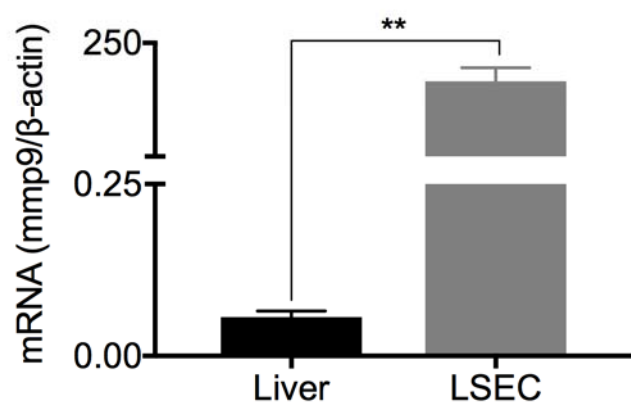

# Supporting Figure S2B

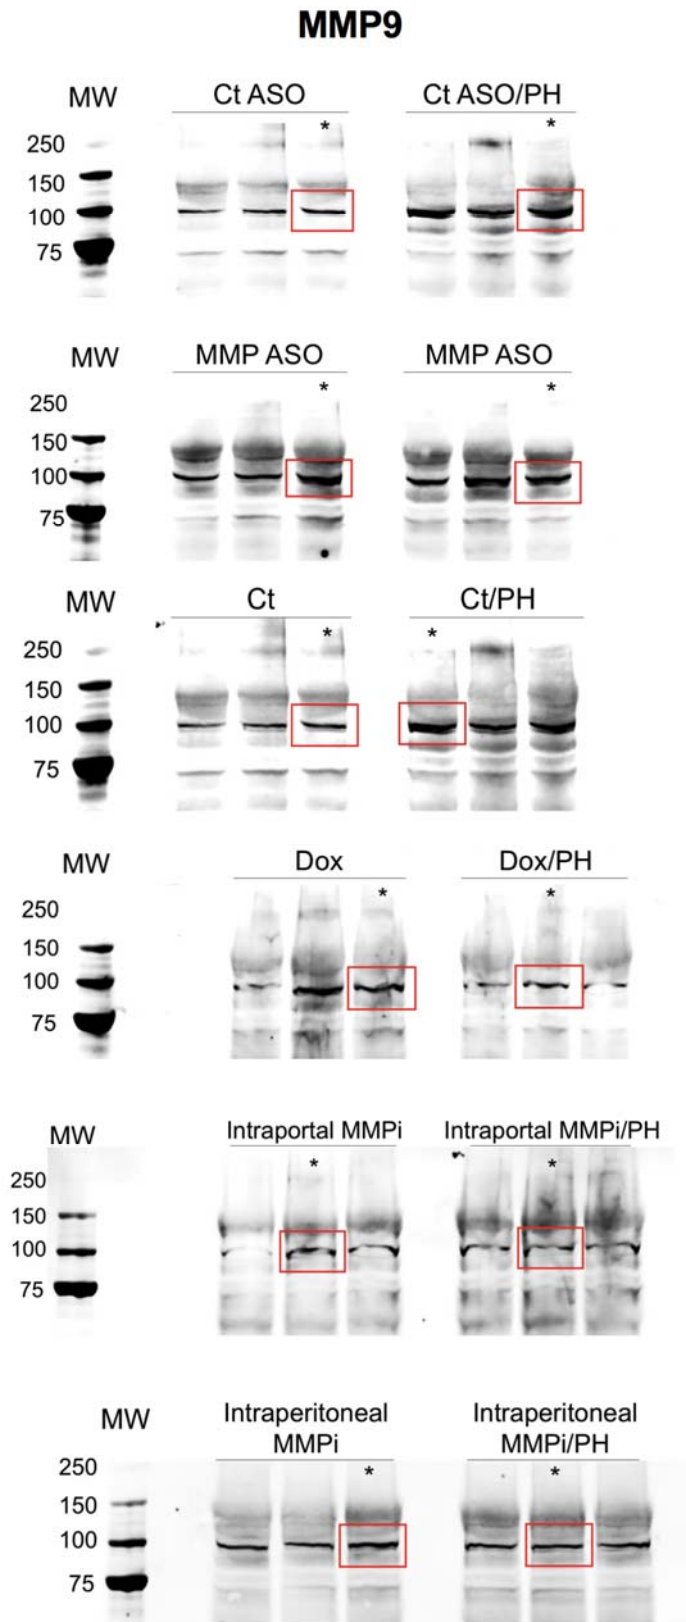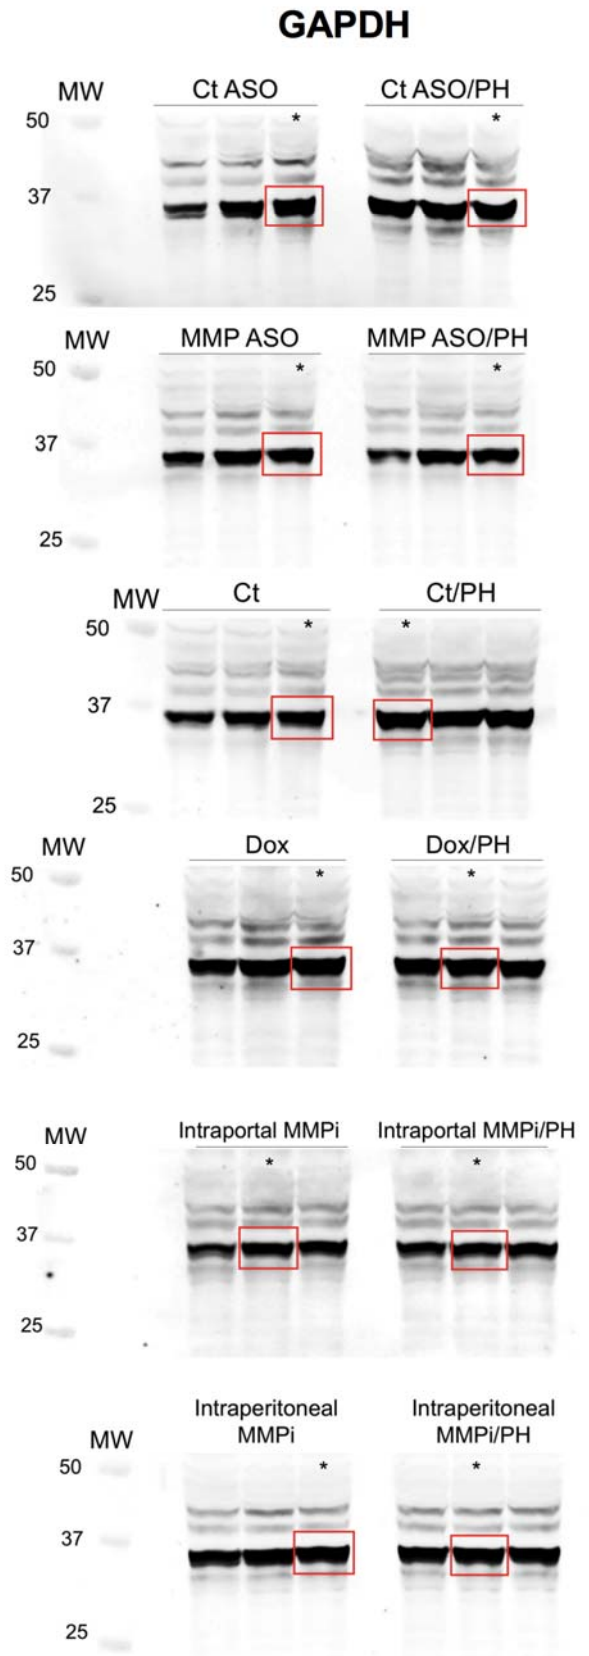

## Supporting Figure S2C

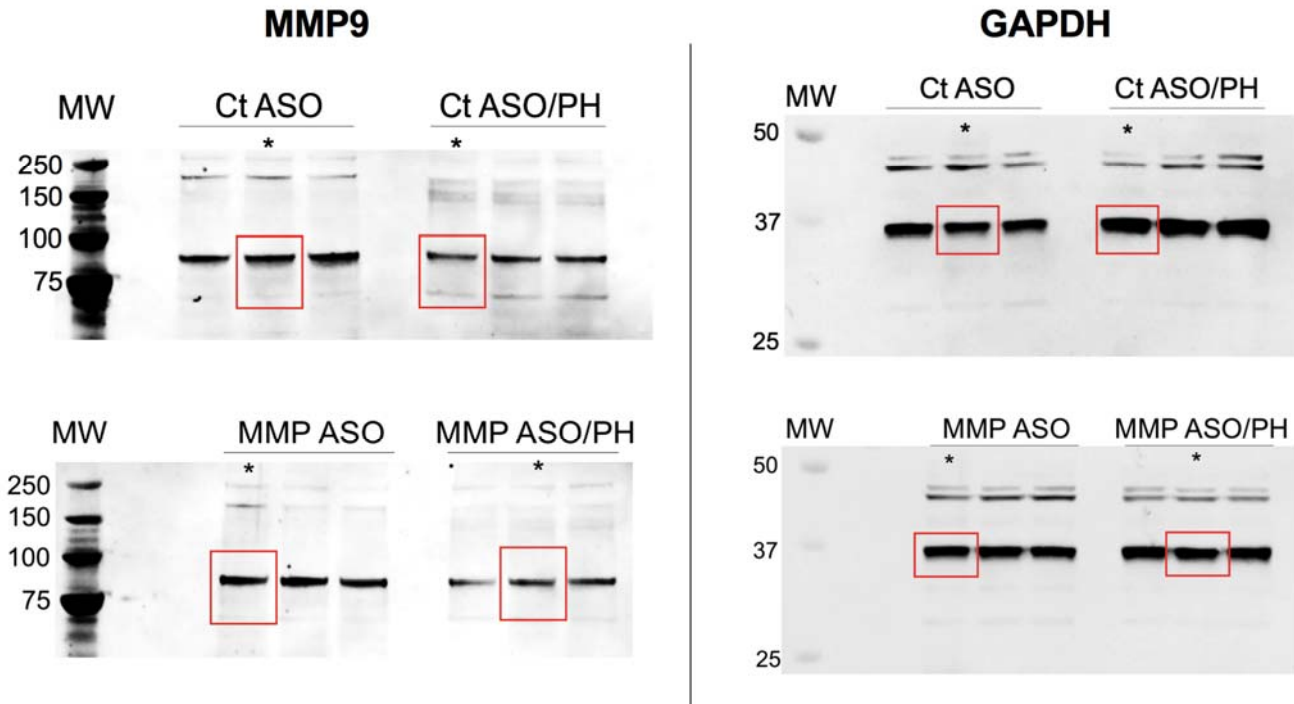

**Supporting Figure S2A: LSEC is a major source of MMP-9 in the liver.** MMP-9 gene expression was measured using RNA extracted from normal whole liver and from normal LSECs. LSECs express significantly higher levels of MMP-9 compared to whole liver, suggesting that LSECs are a major producer of MMP-9 in the liver. These results are consistent with our earlier findings, where we compared the gelatinolytic activity of LSECs, hepatocytes, Kupffer cells and HSCs in vitro, and showed that LSECs are the only significant source of MMP activity among these liver cells (1).

**Supporting Figure S2B: Unprocessed original scans of Immunoblots related to Figure 1A.** Uncropped images of all immunoblots. Red rectangles indicate portion of image used on indicated figure. Molecular size markers in kDa.

**Supporting Figure S2C: Unprocessed original scans of Immunoblots related to Figure 1B.** Uncropped images of all immunoblots. Red rectangles indicate portion of image used on indicated figure. Molecular size markers in kDa.

## Supporting Figure S3A

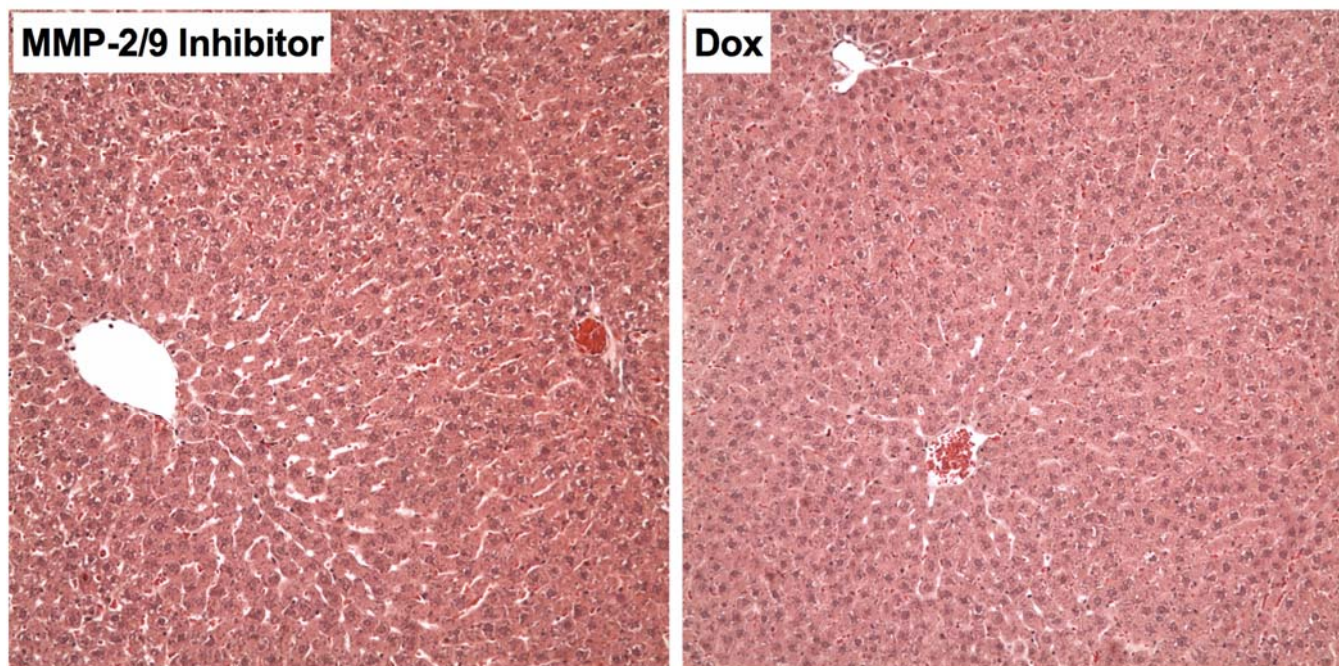

## Supporting Figure S3B

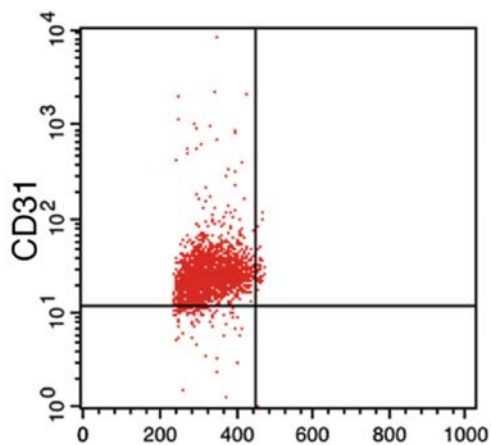

**Supporting Figure S3A: Cytotoxicity of MMP inhibitors.** Histology showed no evidence of toxicity from the MMP-2/9 inhibitor or Doxycycline.

**Supporting Figure S3B: CD31<sup>+</sup> fraction of CD133<sup>+</sup> liver cells.** Whole liver was digested and CD133<sup>+</sup> cells were isolated by immunomagnetic selection. Cells were stained for CD31. At least 94% of the CD133<sup>+</sup> cells were CD31<sup>+</sup>.

## Supporting Figure S4

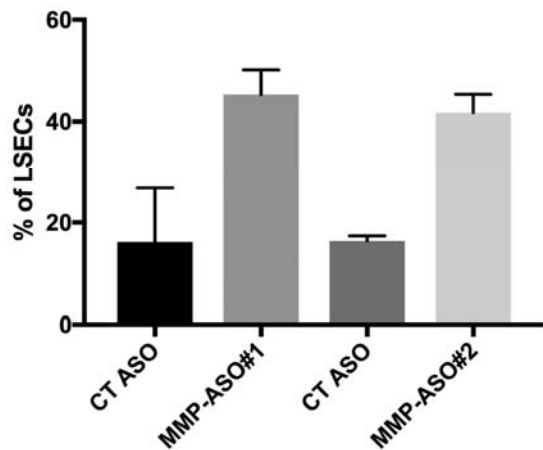

**Supporting Figure S4: Confirmatory MMP-9 ASO.** A second MMP-9 ASO was kindly provided by Ionis Pharmaceuticals to confirm that the effect of pretreatment with the MMP-9 ASO was through MMP-9 inhibition. There was no significant difference in engraftment of BM sprocs after PH between the effect of MMP-9 ASO #1 (also shown in Figure 4D) and a second MMP-9 ASO labeled MMP-9 ASO #2.



## Supporting Figure S5

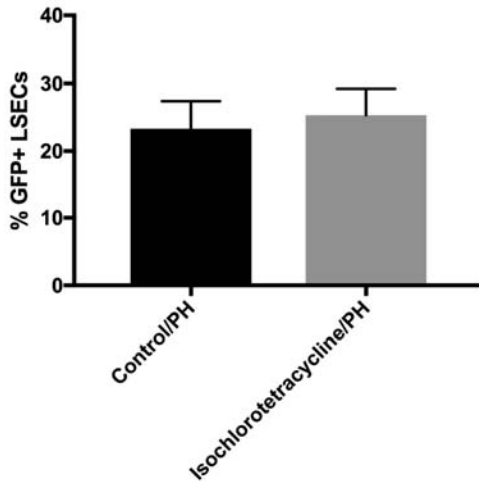

**Supporting Figure S5: Effect of isochlorotetracycline pretreatment on BM sproc engraftment after partial hepatectomy.** Isochlorotetracycline shares an antibiotic effect with doxycycline, but has only weak MMP inhibitory activity. Thus this is a control for the antibiotic effect of doxycycline on recruitment and engraftment.

## Supporting Figure S6

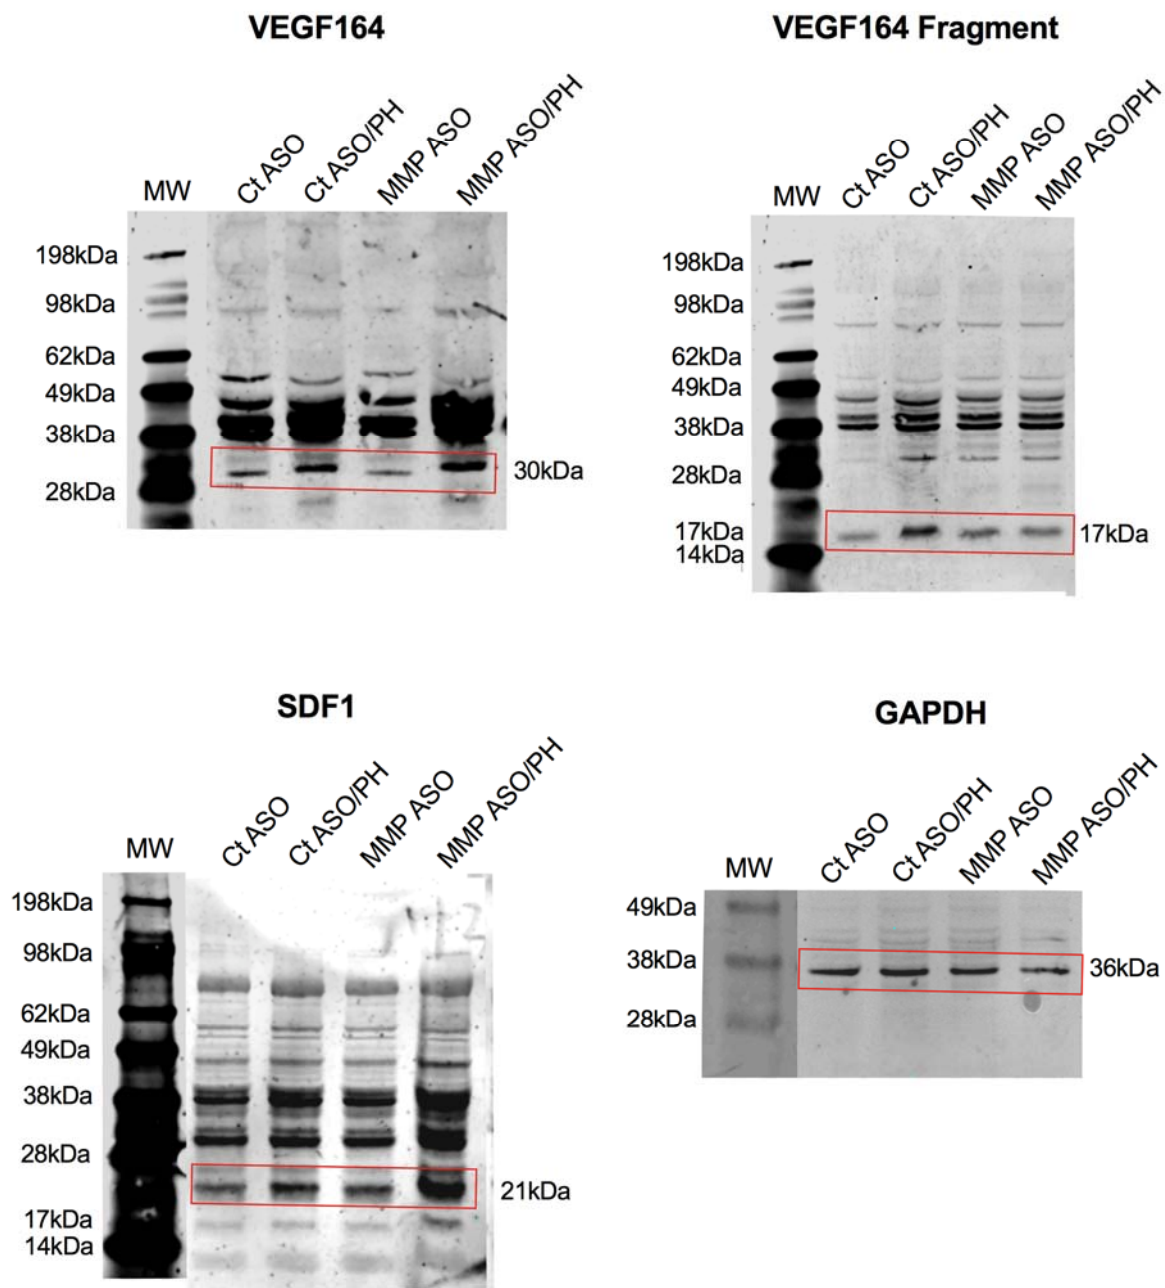

**Supporting Figure S6: Unprocessed original scans of Immunoblots related to Figure 5.**

Uncropped images of all immunoblots. Red rectangles indicate portion of image used for figure 5. Molecular size markers in kDa.

**Supporting Table S1. Antibodies used.**

| <b>Antibody</b>                                                                               | <b>Dilution</b> | <b>Vendor</b>             | <b>Cat #</b> |
|-----------------------------------------------------------------------------------------------|-----------------|---------------------------|--------------|
| Fluorescein Iso-thiocyanate (FITC)-conjugated mouse anti-rat CD45                             | 1:100           | BD Biosciences            | 554877       |
| Phycoerythrin (PE)-conjugated mouse anti-rat CD31                                             | 1:100           | BD Biosciences            | 555027       |
| Peridinin chlorophyll (PerCP)-conjugated mouse anti-proliferating cell nuclear antigen (PCNA) | 1:100           | Santa Cruz Biotechnology  | SC-56PerCP   |
| Mouse monoclonal anti-CD31                                                                    | 1:100           | Santa Cruz Biotechnology  | SC-376764    |
| m-IgG $\kappa$ BP-FITC anti-mouse IgG conjugate                                               | 1:500           | Santa Cruz Biotechnology  | SC-516140    |
| Allophycocyanin (APC)- conjugated mouse anti-CXCR7/RDC1                                       | 1:100           | R&D Systems               | FAB8399A     |
| Rabbit anti-Ki-67 antibody                                                                    | 1:50            | Biocare Medical           | CRM325A      |
| MMP-9 antibody                                                                                | 1:500           | Cell Signaling Technology | 3852S        |
| SDF1 antibody                                                                                 | 1:250           | Cell Signaling Technology | 3740S        |
| VEGF antibody                                                                                 | 1:1000          | Santa Cruz Biotechnology  | SC-1836      |
| GAPDH antibody                                                                                | 1:5000          | Novus Biologicals         | MB300-320    |
| IRDye® 680LT Donkey anti-Rabbit IgG (H + L)                                                   | 1:5000          | Li-Cor Biosciences        | 925-68023    |
| IRDye® 800CW Donkey anti-Goat IgG (H + L)                                                     | 1:5000          | Li-Cor Biosciences        | 925-32214    |

## Supporting Table S2. Antisense oligonucleotide #1 Specificity

| Oligo_ID  | Oligo_Sequence       | Database          | Entrez Gene_ID         | Gene Symbol | Accession                                  | Position | Mismatch Count | Mismatch Annotation | Max Contig | Oligo Length | NCBI Sequence Viewer |
|-----------|----------------------|-------------------|------------------------|-------------|--------------------------------------------|----------|----------------|---------------------|------------|--------------|----------------------|
| Undefined | CCTCGTGGTAGTGATACATG | transcriptome_rat | <a href="#">81687</a>  | Mmp9        | NC_005102.4_TRUNC_161413410_161421473      | 3112     | 0              |                     | 20         | 20           | <a href="#">View</a> |
| Undefined | CCTCGTGGTAGTGATACATG | transcriptome_rat | <a href="#">304832</a> | Cdc73       | NC_005112.4_TRUNC_60403771_60496511_COMP   | 19734    | 2              | 3:C>G,9:C>T         | 10         | 20           | <a href="#">View</a> |
| Undefined | CCTCGTGGTAGTGATACATG | transcriptome_rat | <a href="#">309307</a> | RGD1311595  | NC_005100.4_TRUNC_247898572_247978661_COMP | 17063    | 2              | 3:C>G,13:C>T        | 9          | 20           | <a href="#">View</a> |
| Undefined | CCTCGTGGTAGTGATACATG | refseq_rna_rat    | <a href="#">81687</a>  | Mmp9        | NM_031055.1                                | 1266     | 0              |                     | 20         | 20           | <a href="#">View</a> |

The sequence of MMP-9 ASO#1 (ISIS-283953; 5'-CCTCGTGGTAGTGATACATG-3') was aligned against the rat transcriptome and mRNA reference sequences using the Bowtie Algorithm (2) for any sequences with 0 or one mismatch, or sequences with two mismatches and 18 consecutive matches. Previous experience has demonstrated that ASO are unlikely to have significant activity against transcripts with more than 2 mismatches (3-5). ASO#1 was the MMP ASO used throughout the study and no other gene fell into the category of a possible reduction.

Sequences of other antisense used for this study: MMP-9 ASO#2 (ISIS-283973; 5'-TGTCATGGCAGAAATAGGCC-3') and Scrambled control ASO (ISIS-141932; 5'-CCTTCCCTGAAGGTTCCCTCC-3').

NOTE: Both MMP-9 ASOs showed identical efficacy in promoting engraftment (supporting fig. S3), which is the result of the cumulative effects on bone marrow sproc proliferation, mobilization, and engraftment in the liver.

## References:

1. DeLeve LD, Wang X, Tsai J, Kanel G, Strasberg S, Tokes ZA. Sinusoidal obstruction syndrome (veno-occlusive disease) in the rat is prevented by matrix metalloproteinase inhibition. *Gastroenterology* 2003;125:882-890.
2. Langmead B, Trapnell C, Pop M, Salzberg SL. Ultrafast and memory-efficient alignment of short DNA sequences to the human genome. *Genome Biol* 2009;10:R25.
3. Zhang H, Cook J, Nickel J, Yu R, Stecker K, Myers K, Dean NM. Reduction of liver Fas expression by an antisense oligonucleotide protects mice from fulminant hepatitis. *Nat Biotechnol* 2000;18:862-867.
4. Vickers TA, Koo S, Bennett CF, Crooke ST, Dean NM, Baker BF. Efficient reduction of target RNAs by small interfering RNA and RNase H-dependent antisense agents. A comparative analysis. *J Biol Chem* 2003;278:7108-7118.
5. Cioffi CL, Garay M, Johnston JF, McGraw K, Boggs RT, Hreniuk D, Monia BP. Selective inhibition of A-Raf and C-Raf mRNA expression by antisense oligodeoxynucleotides in rat vascular smooth muscle cells: role of A-Raf and C-Raf in serum-induced proliferation. *Mol Pharmacol* 1997;51:383-389.
